# Supplementary material for: Structural basis for the simultaneous recognition of NEMO and acceptor ubiquitin by the HOIP NZF1 domain
Source: PubMed Central journal article supplement (PMC9294000; doi:10.1038/s41598-022-16193-4), 2022-07-18
Supplement: 41598_2022_16193_MOESM1_ESM.pdf [file 41598_2022_16193_MOESM1_ESM.pdf]

**Structural basis for the simultaneous recognition of NEMO and acceptor ubiquitin by the  
HOIP NZF1 domain**

Simin Rahighi<sup>1\*</sup>, Mamta Iyer<sup>1</sup>, Hamid Oveisi<sup>1,2</sup>, Sammy Nasser<sup>1</sup>, Vincent Duong<sup>1</sup>

<sup>1</sup>Chapman University School of Pharmacy (CUSP), Harry and Diane Rinker Health Science  
Campus, Chapman University, Irvine, CA 92618, USA

<sup>2</sup> Department of Materials and Polymer Engineering, Hakim Sabzevari University, Sabzevar  
9617976478, Iran

\* Correspondence should be addressed to: rahighi@chapman.edu

## Supplementary Figure S1

(A)

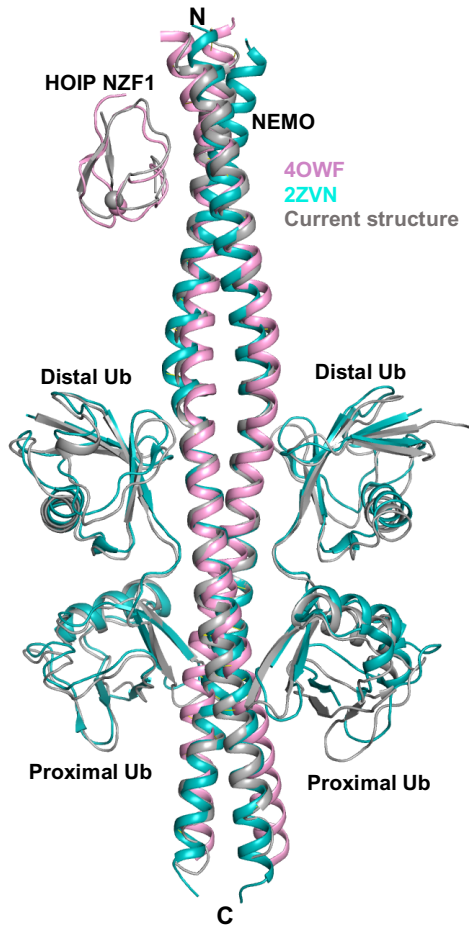

(B)

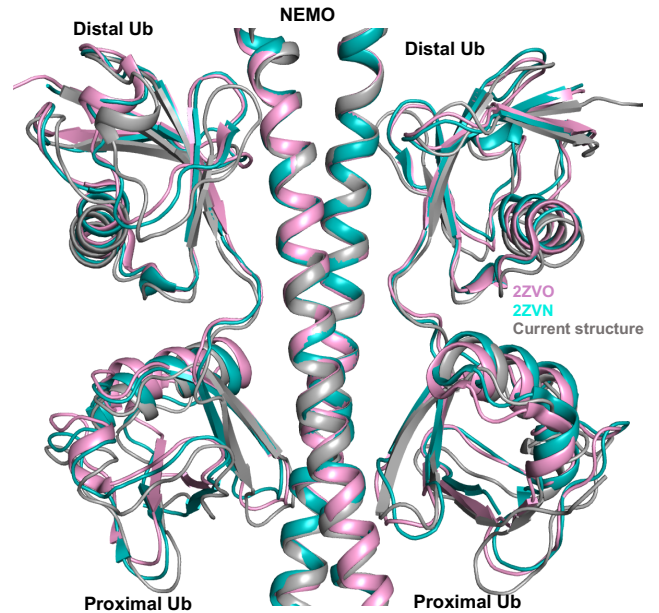

**Supplementary Figure S1.** NEMO in the heteropentameric structure adopts the same binding mode for HOIP-NZF1 and linear diubiquitins as in the heterotrimeric and heterotetrameric structures. (A) Superimposition of the C $\alpha$  atoms of NEMO CoZi in the heteropentameric crystal structure (Gray) on NEMO in complex structures containing HOIP NZF1 (PDB ID: 4OWF, pink) and diubiquitins (PDB ID: 2ZVN, cyan). (B) Superimposition of the C $\alpha$  atoms of UBAN in the heteropentameric structure (Gray) on the UBAN in crystal structures containing linear diubiquitins (2ZVO and 2ZVN).

## Supplementary Figure S2

(A)

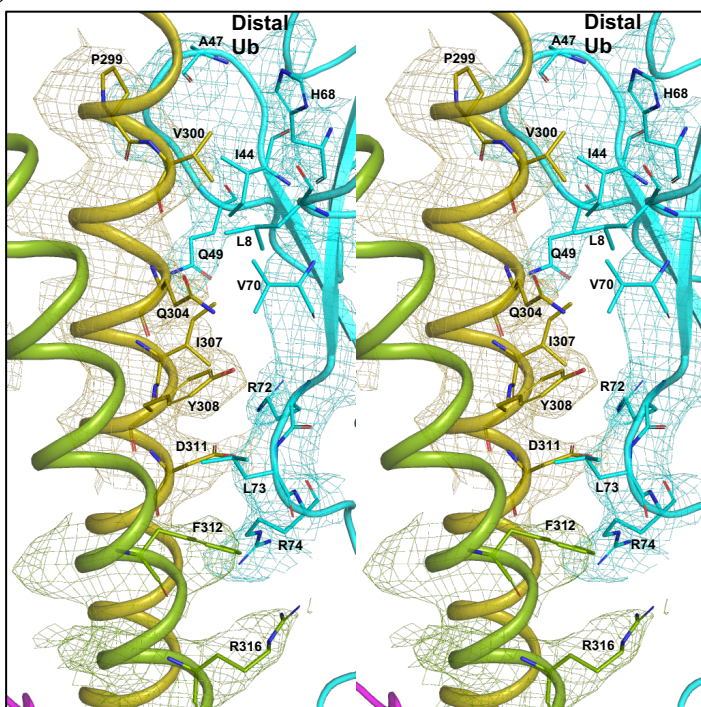

(B)

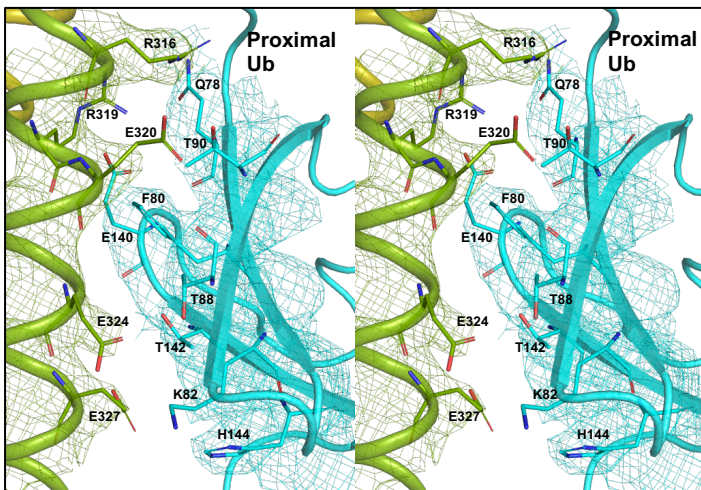

(C)

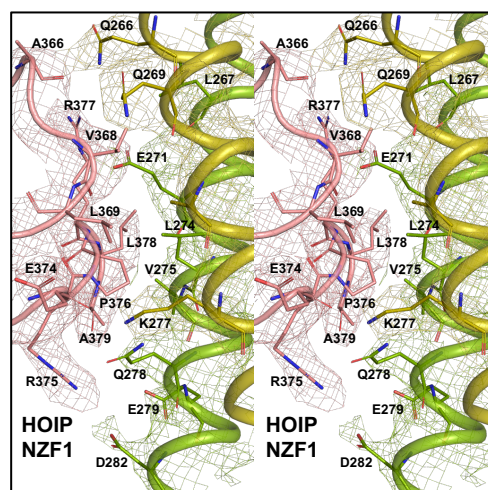

**Supplementary Figure S2.** Stereo-view of interactions of NEMO with distal (A) and proximal (B) ubiquitin in a linear diubiquitin chain, and NEMO with HOIP NZF1 (C). The final  $2F_o - F_c$  electron density map is contoured at  $1.0 \sigma$ .

### Supplementary Figure S3

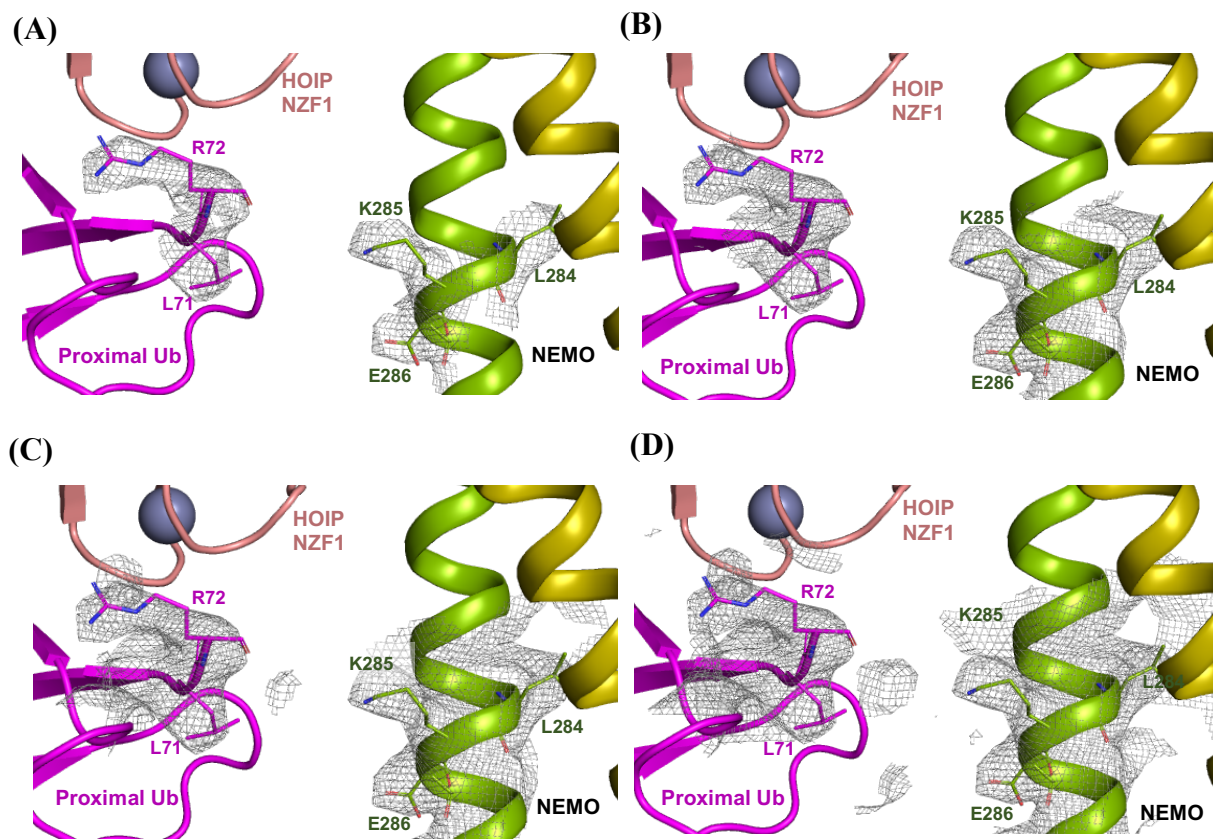

**Supplementary Figure S3.** The C-terminal tail of proximal ubiquitin, including residues L73, R74, G75, and G76, is not visible in the electron density map. (A) to (D) represent the 2Fo - Fc electron density map contoured at 1.0  $\sigma$ , within 1.6  $\text{\AA}$ , 3.0  $\text{\AA}$ , 4.0  $\text{\AA}$ , and 5  $\text{\AA}$  of the L71-R72 of proximal ubiquitin and L284-E286 of NEMO, respectively.
